# Supplementary material for: Effect of Magnesium Borates on the Fire-Retarding Properties of Zinc Borates
Source: Hindawi journal article supplement (doi:10.1155/2014/512164), 2014-01-01

**Name and formula**

Reference code: 00-035-0433  
 PDF index name: Zinc Oxide Borate Hydrate  
 Empirical formula:  $B_6H_7O_{15.5}Zn_3$   
 Chemical formula:  $Zn_3B_6O_{12} \cdot 3.5H_2O$   
 Second chemical formula:  $3ZnO \cdot 3B_2O_3 \cdot 3.5H_2O$

**Crystallographic parameters**

Crystal system: Monoclinic  
 Space group: P21/n  
 Space group number: 14

a (Å): 7,6950  
 b (Å): 9,8028  
 c (Å): 6,8378  
 Alpha (°): 90,0000  
 Beta (°): 107,0300  
 Gamma (°): 90,0000

Calculated density (g/cm<sup>3</sup>): 2,93  
 Measured density (g/cm<sup>3</sup>): 2,69  
 Volume of cell (10<sup>6</sup> pm<sup>3</sup>): 493,18  
 Z: 2,00

RIR: -

**Subfiles and Quality**

Subfiles: Inorganic  
 Corrosion  
 Quality: Star (S)

**Comments**

Temperature: Pattern taken at 293 K.

**References**

Primary reference: Andrews, S. et al., *Private Communication*

**Peak list**

| No. | h | k | l  | d [Å]   | 2Theta[deg] | I [%] |
|-----|---|---|----|---------|-------------|-------|
| 1   | 1 | 1 | 0  | 5,88434 | 15,044      | 6,0   |
| 2   | 1 | 0 | -1 | 5,80342 | 15,255      | 1,0   |
| 3   | 0 | 1 | 1  | 5,43925 | 16,283      | 9,0   |
| 4   | 1 | 1 | -1 | 4,99396 | 17,746      | 86,0  |
| 5   | 0 | 2 | 0  | 4,90137 | 18,084      | 90,0  |
| 6   | 1 | 0 | 1  | 4,30164 | 20,631      | 81,0  |
| 7   | 1 | 2 | 0  | 4,07907 | 21,770      | 96,0  |
| 8   | 1 | 1 | 1  | 3,93901 | 22,554      | 37,0  |
| 9   | 0 | 2 | 1  | 3,92168 | 22,655      | 8,0   |
| 10  | 1 | 2 | -1 | 3,74452 | 23,743      | 100,0 |
| 11  | 2 | 0 | 0  | 3,67872 | 24,174      | 69,0  |
| 12  | 2 | 1 | -1 | 3,46403 | 25,697      | 34,0  |

---

|    |   |   |    |         |        |      |
|----|---|---|----|---------|--------|------|
| 13 | 2 | 1 | 0  | 3,44426 | 25,847 | 96,0 |
| 14 | 0 | 0 | 2  | 3,26896 | 27,259 | 1,0  |
| 15 | 1 | 2 | 1  | 3,23301 | 27,568 | 45,0 |
| 16 | 1 | 1 | -2 | 3,19271 | 27,923 | 1,0  |
| 17 | 0 | 1 | 2  | 3,10113 | 28,765 | 93,0 |
| 18 | 1 | 3 | 0  | 2,98633 | 29,896 | 7,0  |
| 19 | 2 | 2 | -1 | 2,95457 | 30,225 | 86,0 |
| 20 | 2 | 2 | 0  | 2,94221 | 30,355 | 40,0 |
| 21 | 0 | 3 | 1  | 2,92284 | 30,561 | 52,0 |
| 22 | 2 | 0 | -2 | 2,90171 | 30,789 | 65,0 |
| 23 | 1 | 3 | -1 | 2,84733 | 31,392 | 20,0 |
| 24 | 2 | 1 | -2 | 2,78241 | 32,144 | 4,0  |
| 25 | 1 | 2 | -2 | 2,78073 | 32,164 | 4,0  |
| 26 | 2 | 1 | 1  | 2,75191 | 32,510 | 22,0 |
| 27 | 0 | 2 | 2  | 2,71961 | 32,907 | 61,0 |
| 28 | 1 | 1 | 2  | 2,60984 | 34,333 | 2,0  |
| 29 | 1 | 3 | 1  | 2,60198 | 34,440 | 15,0 |
| 30 | 3 | 0 | -1 | 2,55553 | 35,086 | 21,0 |
| 31 | 2 | 2 | -2 | 2,49694 | 35,937 | 44,0 |
| 32 | 2 | 2 | 1  | 2,47484 | 36,269 | 17,0 |
| 33 | 3 | 1 | -1 | 2,47293 | 36,298 | 17,0 |
| 34 | 0 | 4 | 0  | 2,45069 | 36,639 | 30,0 |
| 35 | 2 | 3 | -1 | 2,45005 | 36,649 | 30,0 |
| 36 | 2 | 3 | 0  | 2,44303 | 36,758 | 80,0 |
| 37 | 3 | 1 | 0  | 2,37919 | 37,782 | 1,0  |
| 38 | 1 | 2 | 2  | 2,37001 | 37,934 | 1,0  |
| 39 | 1 | 3 | -2 | 2,34820 | 38,300 | 1,0  |
| 40 | 1 | 4 | 0  | 2,32507 | 38,696 | 1,0  |
| 41 | 0 | 3 | 2  | 2,31100 | 38,941 | 11,0 |
| 42 | 0 | 4 | 1  | 2,29475 | 39,228 | 1,0  |
| 43 | 1 | 0 | -3 | 2,27924 | 39,506 | 6,0  |
| 44 | 3 | 2 | -1 | 2,26603 | 39,746 | 5,0  |
| 45 | 1 | 4 | -1 | 2,25764 | 39,900 | 6,0  |
| 46 | 3 | 1 | -2 | 2,25201 | 40,004 | 12,0 |
| 47 | 1 | 1 | -3 | 2,22000 | 40,606 | 1,0  |
| 48 | 3 | 2 | 0  | 2,19327 | 41,123 | 8,0  |
| 49 | 2 | 3 | -2 | 2,16971 | 41,590 | 1,0  |
| 50 | 2 | 3 | 1  | 2,15516 | 41,884 | 1,0  |
| 51 | 2 | 0 | 2  | 2,15079 | 41,973 | 8,0  |
| 52 | 1 | 4 | 1  | 2,12935 | 42,416 | 4,0  |
| 53 | 0 | 1 | 3  | 2,12739 | 42,457 | 3,0  |
| 54 | 2 | 1 | -3 | 2,12338 | 42,541 | 7,0  |
| 55 | 3 | 0 | 1  | 2,10266 | 42,981 | 19,0 |
| 56 | 2 | 1 | 2  | 2,10079 | 43,021 | 42,0 |
| 57 | 3 | 2 | -2 | 2,09245 | 43,201 | 25,0 |
| 58 | 1 | 3 | 2  | 2,08487 | 43,366 | 13,0 |
| 59 | 1 | 2 | -3 | 2,06670 | 43,767 | 15,0 |
| 60 | 3 | 1 | 1  | 2,05589 | 44,009 | 22,0 |
| 61 | 2 | 4 | -1 | 2,04363 | 44,287 | 15,0 |
| 62 | 2 | 4 | 0  | 2,03956 | 44,380 | 24,0 |
| 63 | 3 | 3 | -1 | 2,01302 | 44,997 | 1,0  |
| 64 | 0 | 2 | 3  | 1,99134 | 45,514 | 1,0  |
| 65 | 2 | 2 | -3 | 1,98807 | 45,593 | 3,0  |
| 66 | 1 | 4 | -2 | 1,98338 | 45,707 | 21,0 |
| 67 | 2 | 2 | 2  | 1,96948 | 46,048 | 42,0 |
| 68 | 3 | 3 | 0  | 1,96147 | 46,247 | 13,0 |
| 69 | 0 | 4 | 2  | 1,96087 | 46,262 | 23,0 |
| 70 | 1 | 0 | 3  | 1,94055 | 46,775 | 7,0  |
| 71 | 3 | 0 | -3 | 1,93450 | 46,930 | 2,0  |
| 72 | 3 | 2 | 1  | 1,93236 | 46,985 | 13,0 |
| 73 | 1 | 1 | 3  | 1,90359 | 47,739 | 3,0  |
| 74 | 3 | 1 | -3 | 1,89790 | 47,891 | 12,0 |
| 75 | 1 | 5 | 0  | 1,89444 | 47,984 | 10,0 |
| 76 | 3 | 3 | -2 | 1,88837 | 48,148 | 1,0  |

---

---

|     |   |   |    |         |        |      |
|-----|---|---|----|---------|--------|------|
| 77  | 4 | 1 | -1 | 1,88759 | 48,169 | 31,0 |
| 78  | 0 | 5 | 1  | 1,87792 | 48,433 | 15,0 |
| 79  | 2 | 4 | -2 | 1,87229 | 48,588 | 21,0 |
| 80  | 1 | 3 | -3 | 1,86940 | 48,668 | 38,0 |
| 81  | 2 | 4 | 1  | 1,86293 | 48,848 | 27,0 |
| 82  | 1 | 5 | -1 | 1,85743 | 49,002 | 16,0 |
| 83  | 4 | 0 | -2 | 1,85144 | 49,171 | 6,0  |
| 84  | 4 | 0 | 0  | 1,83938 | 49,515 | 1,0  |
| 85  | 4 | 1 | -2 | 1,81927 | 50,100 | 25,0 |
| 86  | 1 | 4 | 2  | 1,81696 | 50,168 | 24,0 |
| 87  | 0 | 3 | 3  | 1,81307 | 50,284 | 18,0 |
| 88  | 2 | 3 | -3 | 1,81058 | 50,358 | 8,0  |
| 89  | 4 | 1 | 0  | 1,80783 | 50,439 | 31,0 |
| 90  | 1 | 2 | 3  | 1,80429 | 50,545 | 39,0 |
| 91  | 3 | 2 | -3 | 1,79940 | 50,692 | 20,0 |
| 92  | 2 | 3 | 2  | 1,79652 | 50,779 | 25,0 |
| 93  | 4 | 2 | -1 | 1,79063 | 50,958 | 19,0 |
| 94  | 1 | 5 | 1  | 1,78400 | 51,161 | 7,0  |
| 95  | 3 | 4 | -1 | 1,76879 | 51,634 | 1,0  |
| 96  | 3 | 3 | 1  | 1,76822 | 51,652 | 2,0  |
| 97  | 3 | 4 | 0  | 1,73354 | 52,764 | 4,0  |
| 98  | 2 | 5 | -1 | 1,73268 | 52,792 | 4,0  |
| 99  | 4 | 2 | -2 | 1,73198 | 52,815 | 2,0  |
| 100 | 2 | 5 | 0  | 1,73019 | 52,874 | 16,0 |
| 101 | 4 | 2 | 0  | 1,72212 | 53,141 | 12,0 |
| 102 | 3 | 1 | 2  | 1,70671 | 53,659 | 1,0  |
| 103 | 1 | 5 | -2 | 1,69549 | 54,043 | 1,0  |
| 104 | 2 | 0 | -4 | 1,68839 | 54,289 | 5,0  |
| 105 | 3 | 4 | -2 | 1,68246 | 54,496 | 9,0  |
| 106 | 0 | 5 | 2  | 1,68135 | 54,535 | 1,0  |
| 107 | 1 | 1 | -4 | 1,67959 | 54,597 | 15,0 |
| 108 | 1 | 4 | -3 | 1,66898 | 54,973 | 1,0  |
| 109 | 1 | 3 | 3  | 1,66848 | 54,991 | 15,0 |
| 110 | 3 | 3 | -3 | 1,66466 | 55,128 | 2,0  |
| 111 | 2 | 1 | -4 | 1,66391 | 55,155 | 25,0 |
| 112 | 4 | 3 | -1 | 1,65768 | 55,380 | 5,0  |
| 113 | 2 | 1 | 3  | 1,64866 | 55,709 | 3,0  |
| 114 | 4 | 1 | -3 | 1,64310 | 55,914 | 5,0  |
| 115 | 0 | 0 | 4  | 1,63448 | 56,235 | 2,0  |
| 116 | 3 | 2 | 2  | 1,63403 | 56,252 | 2,0  |
| 117 | 0 | 6 | 0  | 1,63379 | 56,261 | 3,0  |
| 118 | 0 | 4 | 3  | 1,62853 | 56,459 | 20,0 |
| 119 | 2 | 4 | -3 | 1,62675 | 56,526 | 7,0  |
| 120 | 4 | 1 | 1  | 1,62633 | 56,542 | 7,0  |
| 121 | 2 | 5 | -2 | 1,62451 | 56,611 | 15,0 |
| 122 | 2 | 5 | 1  | 1,61838 | 56,845 | 2,0  |
| 123 | 2 | 4 | 2  | 1,61653 | 56,916 | 8,0  |
| 124 | 0 | 1 | 4  | 1,61222 | 57,082 | 15,0 |
| 125 | 4 | 3 | -2 | 1,61083 | 57,136 | 1,0  |
| 126 | 1 | 2 | -4 | 1,61016 | 57,162 | 29,0 |
| 127 | 4 | 3 | 0  | 1,60287 | 57,446 | 8,0  |
| 128 | 2 | 2 | -4 | 1,59634 | 57,703 | 2,0  |
| 129 | 3 | 4 | 1  | 1,59581 | 57,724 | 4,0  |
| 130 | 1 | 6 | 0  | 1,59495 | 57,758 | 2,0  |
| 131 | 1 | 5 | 2  | 1,58797 | 58,036 | 16,0 |
| 132 | 0 | 6 | 1  | 1,58505 | 58,153 | 4,0  |
| 133 | 2 | 2 | 3  | 1,58287 | 58,241 | 23,0 |
| 134 | 4 | 2 | -3 | 1,57795 | 58,440 | 7,0  |
| 135 | 1 | 6 | -1 | 1,57265 | 58,656 | 1,0  |
| 136 | 3 | 1 | -4 | 1,57163 | 58,698 | 1,0  |
| 137 | 4 | 2 | 1  | 1,56309 | 59,050 | 1,0  |
| 138 | 3 | 5 | -1 | 1,55552 | 59,366 | 1,0  |
| 139 | 0 | 2 | 4  | 1,55054 | 59,576 | 2,0  |
| 140 | 5 | 0 | -1 | 1,53514 | 60,235 | 1,0  |

---

---

|     |   |   |    |         |        |      |
|-----|---|---|----|---------|--------|------|
| 141 | 3 | 5 | 0  | 1,53137 | 60,399 | 1,0  |
| 142 | 3 | 3 | 2  | 1,53114 | 60,409 | 12,0 |
| 143 | 1 | 6 | 1  | 1,52734 | 60,575 | 9,0  |
| 144 | 1 | 4 | 3  | 1,52134 | 60,839 | 2,0  |
| 145 | 3 | 4 | -3 | 1,51843 | 60,968 | 1,0  |
| 146 | 5 | 1 | -1 | 1,51665 | 61,048 | 6,0  |
| 147 | 3 | 2 | -4 | 1,51432 | 61,152 | 3,0  |
| 148 | 4 | 4 | -1 | 1,51314 | 61,204 | 3,0  |
| 149 | 1 | 3 | -4 | 1,51144 | 61,281 | 9,0  |
| 150 | 5 | 1 | -2 | 1,50069 | 61,767 | 1,0  |
| 151 | 2 | 3 | -4 | 1,49999 | 61,799 | 7,0  |
| 152 | 3 | 5 | -2 | 1,49580 | 61,992 | 11,0 |
| 153 | 2 | 6 | -1 | 1,49476 | 62,040 | 1,0  |
| 154 | 2 | 6 | 0  | 1,49316 | 62,113 | 5,0  |
| 155 | 2 | 3 | 3  | 1,48878 | 62,316 | 6,0  |
| 156 | 1 | 1 | 4  | 1,48758 | 62,372 | 2,0  |
| 157 | 1 | 5 | -3 | 1,48633 | 62,431 | 2,0  |
| 158 | 4 | 3 | -3 | 1,48469 | 62,507 | 2,0  |
| 159 | 4 | 4 | -2 | 1,47726 | 62,858 | 1,0  |
| 160 | 4 | 3 | 1  | 1,47230 | 63,094 | 2,0  |
| 161 | 4 | 4 | 0  | 1,47111 | 63,151 | 2,0  |
| 162 | 1 | 6 | -2 | 1,47069 | 63,171 | 2,0  |
| 163 | 5 | 2 | -1 | 1,46496 | 63,446 | 9,0  |
| 164 | 0 | 3 | 4  | 1,46180 | 63,600 | 7,0  |
| 165 | 0 | 6 | 2  | 1,46143 | 63,618 | 1,0  |
| 166 | 0 | 5 | 3  | 1,45754 | 63,807 | 7,0  |
| 167 | 2 | 5 | -3 | 1,45625 | 63,871 | 1,0  |
| 168 | 5 | 1 | 0  | 1,45521 | 63,922 | 8,0  |
| 169 | 4 | 0 | -4 | 1,45087 | 64,136 | 2,0  |
| 170 | 5 | 2 | -2 | 1,45055 | 64,151 | 2,0  |
| 171 | 2 | 5 | 2  | 1,44891 | 64,233 | 1,0  |
| 172 | 1 | 2 | 4  | 1,43871 | 64,743 | 1,0  |
| 173 | 4 | 1 | -4 | 1,43523 | 64,920 | 3,0  |
| 174 | 3 | 5 | 1  | 1,43393 | 64,986 | 1,0  |
| 175 | 3 | 0 | 3  | 1,43384 | 64,990 | 4,0  |
| 176 | 4 | 0 | 2  | 1,43362 | 65,002 | 4,0  |
| 177 | 3 | 3 | -4 | 1,43134 | 65,118 | 2,0  |
| 178 | 5 | 0 | -3 | 1,42898 | 65,239 | 3,0  |
| 179 | 2 | 6 | -2 | 1,42365 | 65,514 | 1,0  |
| 180 | 2 | 6 | 1  | 1,41951 | 65,729 | 1,0  |
| 181 | 3 | 1 | 3  | 1,41874 | 65,769 | 6,0  |
| 182 | 4 | 1 | 2  | 1,41853 | 65,780 | 6,0  |
| 183 | 3 | 4 | 2  | 1,41506 | 65,962 | 15,0 |
| 184 | 5 | 1 | -3 | 1,41403 | 66,016 | 5,0  |
| 185 | 5 | 2 | 0  | 1,40936 | 66,263 | 3,0  |
| 186 | 1 | 4 | -4 | 1,39947 | 66,792 | 1,0  |
| 187 | 1 | 6 | 2  | 1,39886 | 66,825 | 1,0  |
| 188 | 4 | 2 | -4 | 1,39120 | 67,242 | 4,0  |
| 189 | 2 | 4 | -4 | 1,39037 | 67,287 | 1,0  |
| 190 | 5 | 3 | -1 | 1,38945 | 67,338 | 10,0 |
| 191 | 2 | 4 | 3  | 1,38144 | 67,781 | 2,0  |
| 192 | 1 | 5 | 3  | 1,37918 | 67,907 | 1,0  |
| 193 | 4 | 4 | -3 | 1,37816 | 67,964 | 5,0  |
| 194 | 5 | 3 | -2 | 1,37713 | 68,022 | 1,0  |
| 195 | 3 | 5 | -3 | 1,37700 | 68,029 | 1,0  |
| 196 | 3 | 6 | -1 | 1,37652 | 68,056 | 1,0  |
| 197 | 3 | 2 | 3  | 1,37617 | 68,076 | 17,0 |
| 198 | 4 | 2 | 2  | 1,37595 | 68,088 | 17,0 |
| 199 | 1 | 7 | 0  | 1,37569 | 68,103 | 1,0  |

Stick Pattern

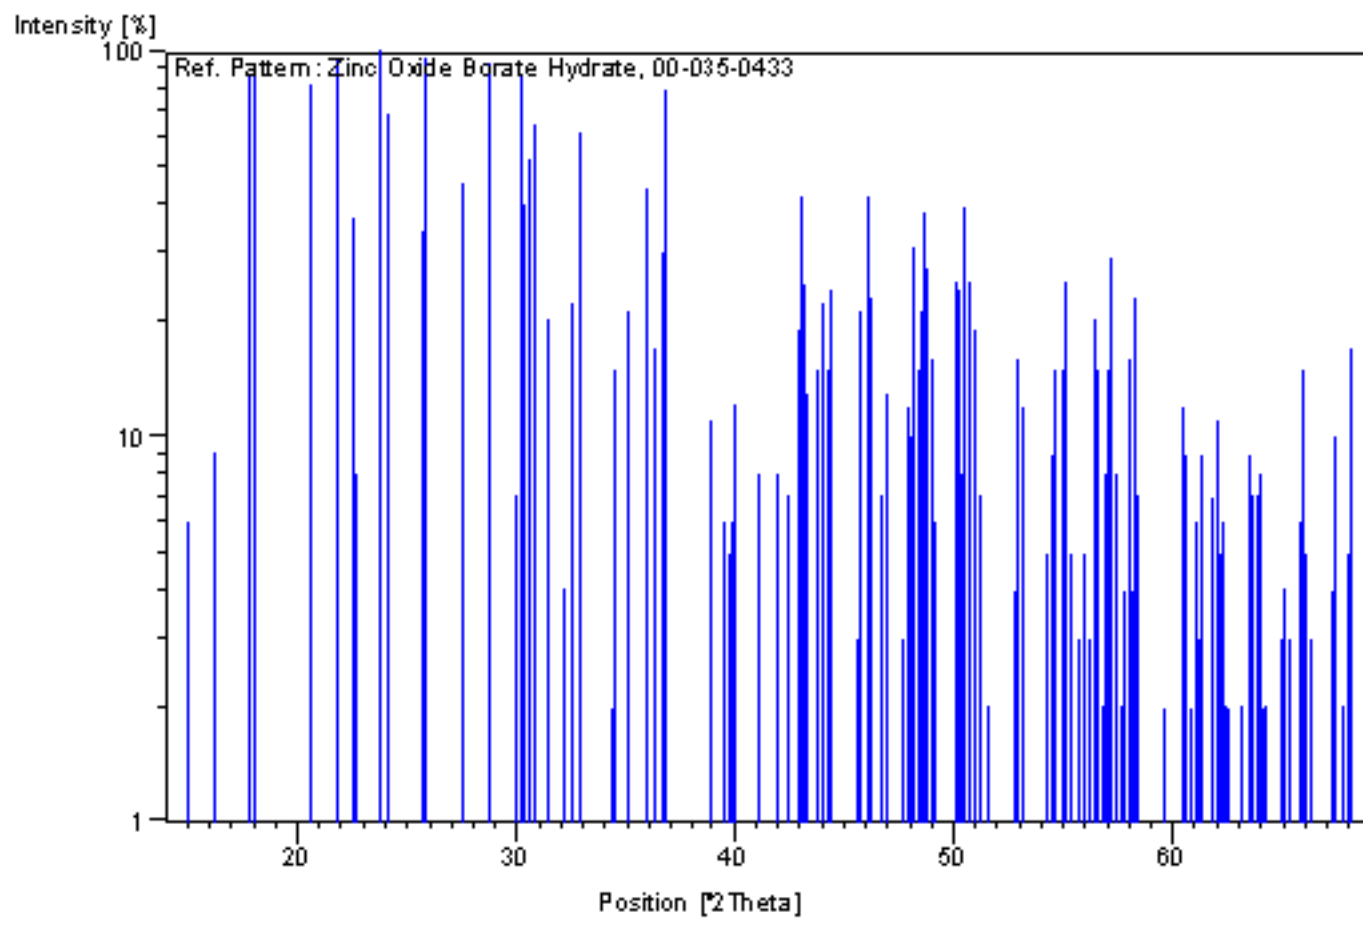

Supplement: f1 [file 512164.f1.pdf]
